# Supplementary material for: De-Novo Assembly and Analysis of the Heterozygous Triploid Genome of the Wine Spoilage Yeast Dekkera bruxellensis AWRI1499
Source: PubMed Central journal article supplement (PMC3314683; doi:10.1371/journal.pone.0033840), 2012-03-28
Supplement: pone.0033840.s003.pdf [file pone.0033840.s003.pdf]

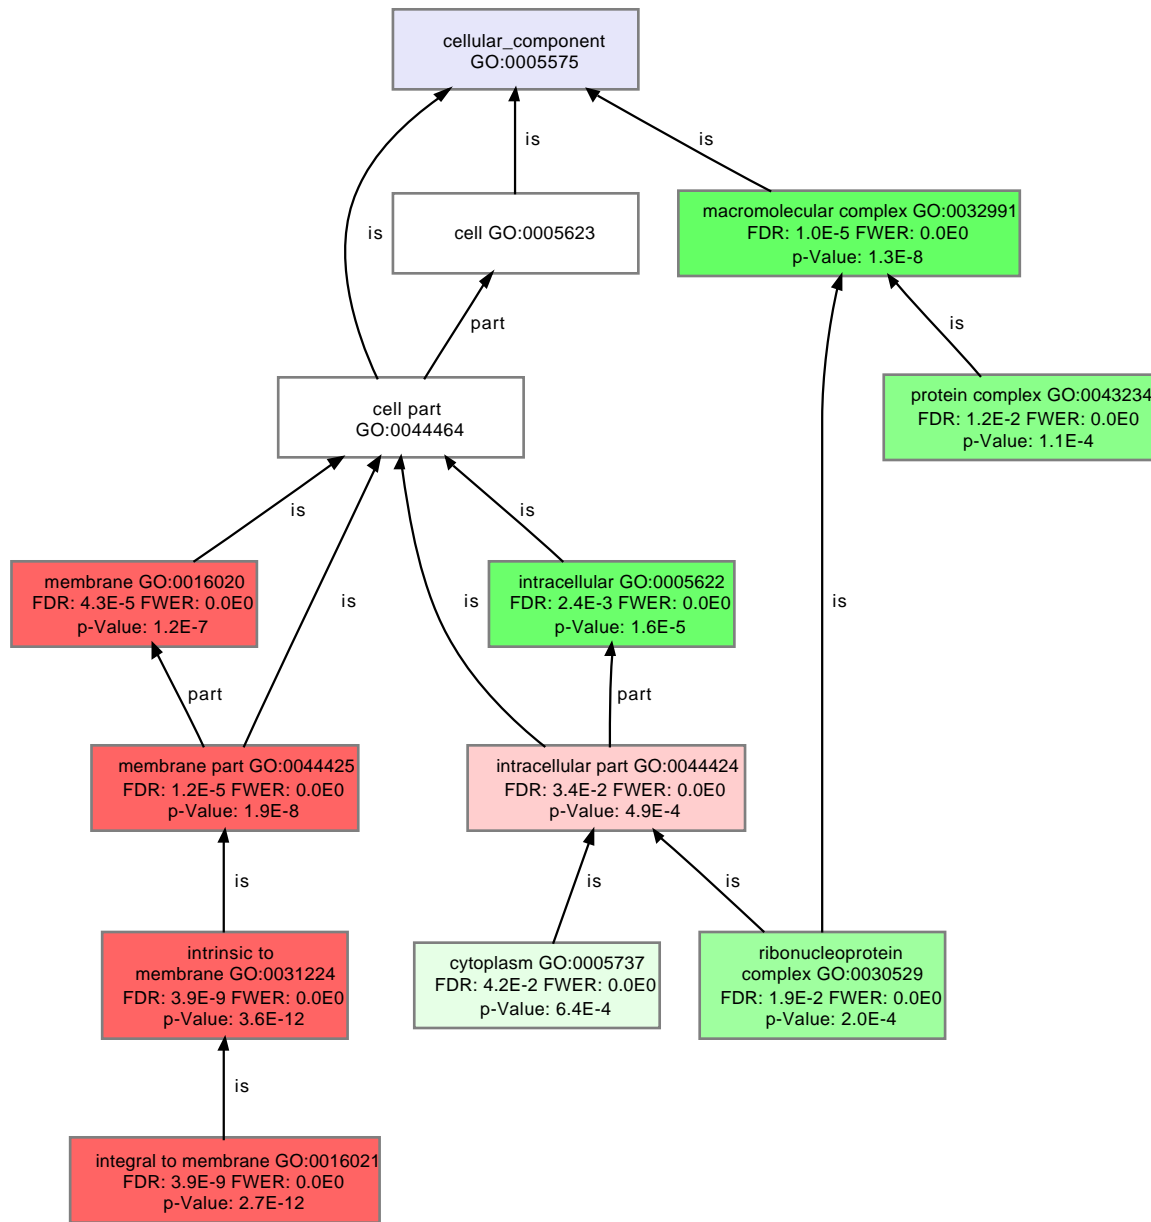

Enriched Graph
