# Supplementary material for: De-Novo Assembly and Analysis of the Heterozygous Triploid Genome of the Wine Spoilage Yeast Dekkera bruxellensis AWRI1499
Source: PLOS journal article supplement (doi:10.1371/journal.pone.0033840), 2012-03-28
Supplement: S7 (10.1371/journal.pone.0033840.s007) [file journal.pone.0033840.s007]

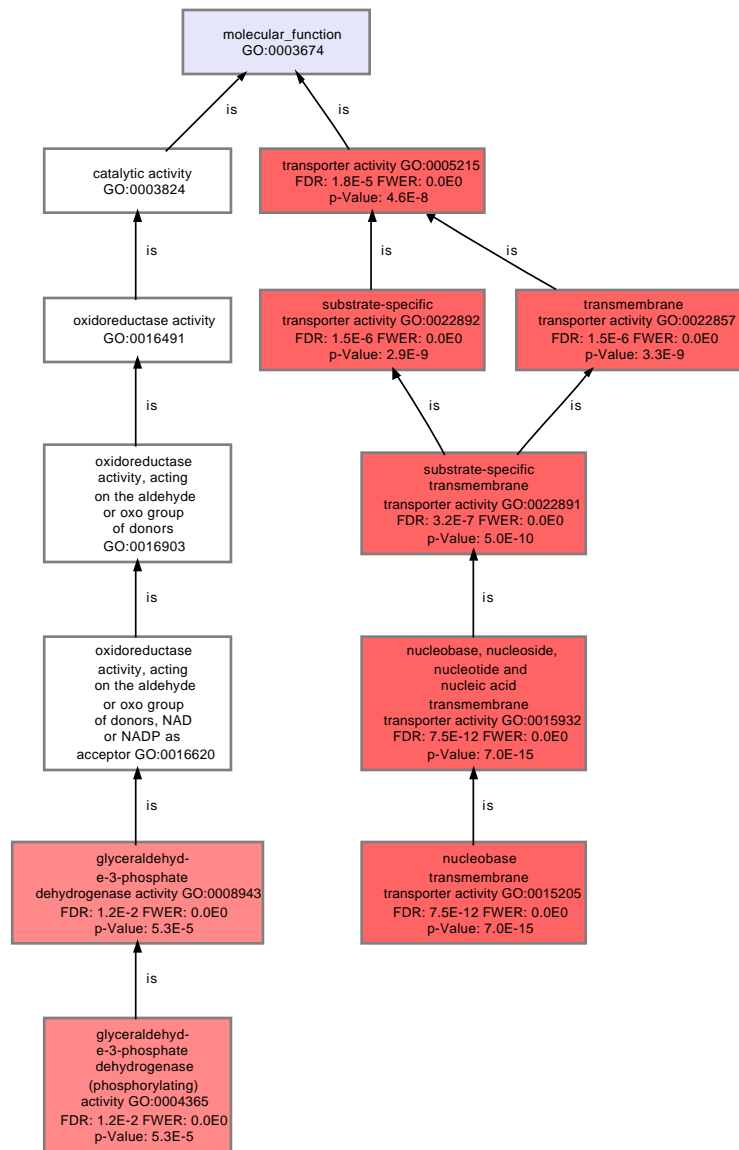

Enriched Graph
